# Supplementary material for: Historia contemporánea de Navarra
Source: Hindawi journal article supplement (doi:10.1155/2016/2452985), 1982-01-01

**One**

**Three**

**Five**

**Seven**

**Nine**

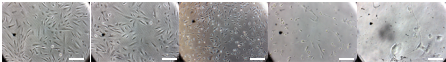

**Eleven**

**Thirteen**

**Four**

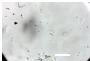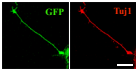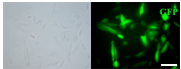

Supplement: f1 [file 2452985.f1.pdf]
